# Supplementary material for: Weaving Care from the Margins: How LGBTIQ+ Medical Trainees Craft Professional Identity through Vulnerability
Source: Research Square preprint supplement (doi:10.21203/rs.3.rs-7542805/v1), 2025-09-24
Supplement: Supplementary file 1 [file 12f5e0e081bd01d659432f4a.docx]

**Weaving Care from the Margins: How LGBTIQ+ Medical Trainees Craft Professional Identity through Vulnerability**

**Olmos-Vega FM, Caicedo-Montaño, CA, Gelvez-Nieto JC, Aluja-Jaramillo F**

**Supplementary Material**

**Interview Guide #1 – Intensive Interview**

**Opening Questions**

- Could you tell me a little about yourself? (age, gender, sexual orientation, gender identity, etc.)
- What year of medical school are you currently in?
- How do you identify in terms of your sexual orientation and/or gender identity?
- Beyond your LGBTIQ+ identity, are there other identities (such as race, social class, religion) that you consider important in your life?

**Intermediate Questions**

- Thinking about your experiences in medical school so far, which parts of your identity do you feel are most present or relevant as you navigate this environment?
- In what ways, if any, does being [specific LGBTIQ+ identity] influence how you experience other aspects of your identity (such as race, gender, socioeconomic background) in medical school?
- Can you tell me about a time when being [specific LGBTIQ+ identity] felt particularly relevant or impactful during your medical training?
- How do you feel your experiences in medical school have been similar to or different from those of your peers who are not part of the LGBTIQ+ community?

**Key questions**

- Could you share an example of when you felt your identity as [specific LGBTIQ+ identity] influenced how professors, staff, or other students perceived or treated you?
- How has your experience as an LGBTIQ+ medical student influenced your approach to patient care?
- In what ways has being part of the LGBTIQ+ community influenced your career aspirations or the type of physician you hope to become?
- Can you think of specific examples within the curriculum or your medical training where LGBTIQ+ identities were addressed? How did that impact you?
- Do you feel that the culture of medicine, or its unwritten rules, affect LGBTIQ+ students differently?
- If you could change one thing about medical education to make it more inclusive for LGBTIQ+ students, what would it be and why?
- How can medical schools better prepare all students to care for a diverse patient population, including LGBTIQ+ people?

**Closing Questions**

- Finally, do you have any concerns about the interview, or would you like to clarify a particular topic or share additional comments?
- What would you like to emphasize or highlight from the conversation we had today?

**Interview Guide #2 – Intensive Interview**

**Opening Questions**

- How have your identities—such as gender, sexual orientation, social class, or ethnic background—influenced your training?
- What has it been like for you to decide which aspects of your identity to share or keep private during your training?
- How do you navigate spaces where you feel that some part of you might not be welcome or understood?

**Intermediate Questions**

- What does it mean to you to be visible in clinical or professional spaces?
- Which spaces or relationships help you feel safe or supported during residency?
- What do you feel you need in order to feel a sense of belonging in medicine?
- How have you created or found moments of relief, connection, or affirmation?
- What does it mean to you to be supported by others at this stage of your training?

**Key Questions**

- How have your own experiences with hardship, exclusion, or pain influenced the way you relate to others in the clinical environment?
- What has illness or suffering come to mean to you, as someone who also knows vulnerability from within?
- In what ways do you think your identities shape your understanding of your patients’ experiences of fear, dependency, or loss?
- How do you feel your personal history transforms the way you listen, observe, or respond as a physician?
- What lessons about care have emerged from the challenges you have faced?
- What does caring mean to you?
- How do you imagine the kind of physician you are becoming?
- Which ideas of professionalism have you decided to keep, and which have you questioned, redefined, or left behind?
- What role do empathy, connection, or emotion play in how you understand your work with patients?
- What kind of future do you imagine for yourself in medicine, and how does your identity influence that vision?
- In what ways do you think your way of being a physician differs from the traditional image or expectation?

**Closing Questions**

- Looking back at what we’ve talked about today, what stands out to you the most?
- Is there anything you would like to emphasize, clarify, or add before we close?
